# Supplementary material for: Unimodal polyethylenes of high linearity and narrow dispersity by using ortho-4,4′-dichlorobenzhydryl-modified bis(imino)pyridyl-iron catalysts
Source: Royal Society of Chemistry journal article supplement (doi:10.1039/d2nj06212g), 2023-01-01
Supplement: d2nj06212g1.pdf [file d2nj06212g1.pdf]

Electronic Supplementary Material (ESI) for New Journal of Chemistry.

This journal is © The Royal Society of Chemistry and the Centre National de la Recherche Scientifique 2023

## Supporting Information

### Unimodal polyethylenes of high linearity and narrow dispersity by using *ortho*-4,4'-dichlorobenzhydryl-modified bis(imino)pyridyl-iron catalysts

Tian Liu,<sup>a,b</sup> Yanping Ma,<sup>a</sup> Gregory A. Solan,<sup>\*a,c</sup> Yang Sun,<sup>a</sup> and Wen-Hua Sun<sup>a,b,d\*</sup>

<sup>a</sup> Key Laboratory of Engineering Plastics and Beijing National Laboratory for Molecular Science, Institute of Chemistry, Chinese Academy of Sciences, Beijing 100190, China. E-mail: [whsun@iccas.ac.cn](mailto:whsun@iccas.ac.cn)

<sup>b</sup> CAS Research/Education Center for Excellence in Molecular Sciences, University of Chinese Academy of Sciences, Beijing 100049, China.

<sup>c</sup> Department of Chemistry, University of Leicester, University Road, Leicester LE1 7RH, UK. E-mail: [gas8@leicester.ac.uk](mailto:gas8@leicester.ac.uk).

<sup>d</sup> State Key Laboratory for Oxo Synthesis and Selective Oxidation, Lanzhou Institute of Chemical Physics, Chinese Academy of Sciences, Lanzhou 730000, China.

E-mail: [whsun@iccas.ac.cn](mailto:whsun@iccas.ac.cn); Fax: +86-10-62618239; Tel: +86-10-62557955.

#### Contents

1. **Table S1.** Crystal data and structure refinements for **Fe2** and **Fe5**
2. **Fig. S1 - Fig. S5** GPC traces of the polymer molecular weight.
3. **Fig. S6** For **Fe1/MMAO**: (a) plots of catalytic activity and molecular weight of the polymer versus Al:Co molar ratio and (b) GPC traces of the polymer molecular weight as a function of the molar ratio (entries 2 and 6 - 9, Table 3).
4. **Fig. S7** For **Fe1/MMAO**: (a) plots of catalytic activity and molecular weight of the polymer versus reaction time and (b) GPC traces of the polymer molecular weight as a function of reaction time (entries 8 and 10 - 13, Table 3).
5. **Fig. S8** For **Fe1 – Fe6** with MAO as co-catalyst: GPC traces of the polymer as a function of the iron precatalyst (entries 8 and 16 - 20, Table 3).
6. **Fig. S9** <sup>13</sup>C NMR spectrum of the polyethylene obtained using **Fe1/MMAO** at 50 °C (entry 8, Table 3); recorded in 1,1,2,2-tetrachloroethane-*d*<sub>2</sub> at 100 °C
7. **Fig. S10 - Fig. S14** High resolution (ESI-MS) mass spectrometric data for **Fe1 – Fe5**.

**Table S1.** Crystal data and structure refinements for **Fe2** and **Fe5**

| Identification code                         | <b>Fe2</b>                                                       | <b>Fe5</b>                                                       |
|---------------------------------------------|------------------------------------------------------------------|------------------------------------------------------------------|
| CCDC number                                 | 2231616                                                          | 2231617                                                          |
| Empirical formula                           | C <sub>52</sub> H <sub>46</sub> Cl <sub>6</sub> FeN <sub>3</sub> | C <sub>53</sub> H <sub>49</sub> Cl <sub>8</sub> FeN <sub>4</sub> |
| Formula weight                              | 981.47                                                           | 1081.41                                                          |
| Temperature/K                               | 169.99(11)                                                       | 100.00(10)                                                       |
| Crystal system                              | monoclinic                                                       | monoclinic                                                       |
| Space group                                 | P2 <sub>1</sub> /n                                               | P2 <sub>1</sub> /n                                               |
| a/Å                                         | 9.5593(3)                                                        | 9.6074(2)                                                        |
| b/Å                                         | 35.4325(9)                                                       | 35.6770(10)                                                      |
| c/Å                                         | 14.4482(4)                                                       | 15.0592(6)                                                       |
| α/°                                         | 90                                                               | 90                                                               |
| β/°                                         | 106.610(3)                                                       | 97.548(3)                                                        |
| γ/°                                         | 90                                                               | 90                                                               |
| Volume/Å <sup>3</sup>                       | 4689.5(2)                                                        | 5117.0(3)                                                        |
| Z                                           | 4                                                                | 4                                                                |
| ρ <sub>calc</sub> /cm <sup>3</sup>          | 1.390                                                            | 1.404                                                            |
| μ/mm <sup>-1</sup>                          | 6.027                                                            | 6.520                                                            |
| F(000)                                      | 2028.0                                                           | 2228.0                                                           |
| Crystal size/mm <sup>3</sup>                | 0.2 × 0.15 × 0.02                                                | 0.25 × 0.1 × 0.03                                                |
| Radiation                                   | Cu Kα (λ = 1.54184)                                              | Cu Kα (λ = 1.54184)                                              |
| 2θ range for data collection/°              | 4.988 to 150.804                                                 | 4.954 to 151.43                                                  |
| Index ranges                                | -11 ≤ h ≤ 11, -33 ≤ k ≤ 44, -18 ≤ l ≤ 17                         | -11 ≤ h ≤ 11, -44 ≤ k ≤ 43, -18 ≤ l ≤ 18                         |
| Reflections collected                       | 35062                                                            | 34363                                                            |
| Independent reflections                     | 9297 [R <sub>int</sub> = 0.0792, R <sub>sigma</sub> = 0.0643]    | 10142 [R <sub>int</sub> = 0.0706, R <sub>sigma</sub> = 0.0614]   |
| Data/restraints/parameters                  | 9297/0/564                                                       | 10142/0/568                                                      |
| Goodness-of-fit on F <sup>2</sup>           | 1.053                                                            | 1.062                                                            |
| Final R indexes [I ≥ 2σ (I)]                | R <sub>1</sub> = 0.0745, wR <sub>2</sub> = 0.1975                | R <sub>1</sub> = 0.0859, wR <sub>2</sub> = 0.2402                |
| Final R indexes [all data]                  | R <sub>1</sub> = 0.0955, wR <sub>2</sub> = 0.2123                | R <sub>1</sub> = 0.1059, wR <sub>2</sub> = 0.2648                |
| Largest diff. peak/hole / e Å <sup>-3</sup> | 1.12/-0.58                                                       | 1.54/-1.44                                                       |

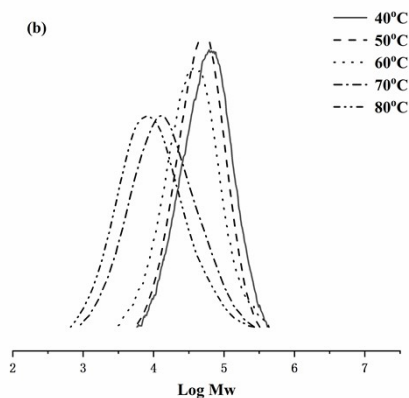

**Fig. S1** For Fe1/MAO: GPC traces of the polymer molecular weight as a function of temperature (entries 1 - 5, Table 2).

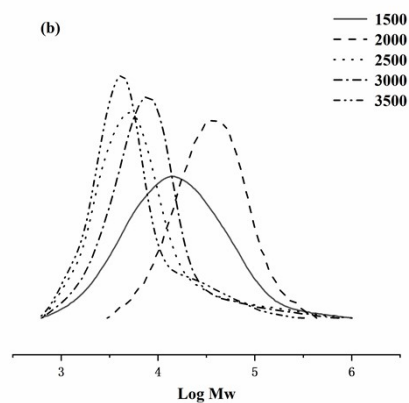

**Fig. S2** For Fe1/MAO: GPC traces of the polymer molecular weight as a function of the molar ratio (entries 3 and 6 - 9, Table 2).

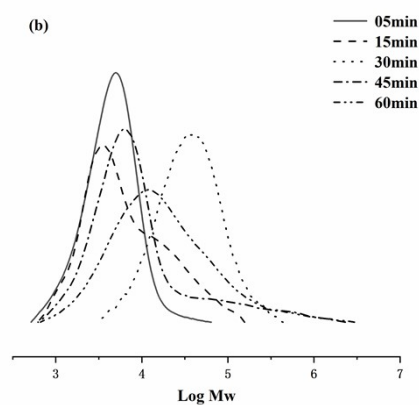

**Fig. S3** For Fe1/MAO: GPC traces of the polymer molecular weight as a function of reaction time (entries 7 and 10 - 13, Table 2).

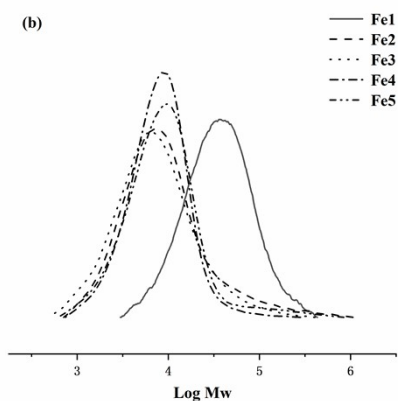

**Fig. S4** For **Fe1 – Fe5** using MAO as co-catalyst: GPC traces of the polymer molecular weight as a function of the iron precatalyst (entries 7 and 16 - 20, Table 2).

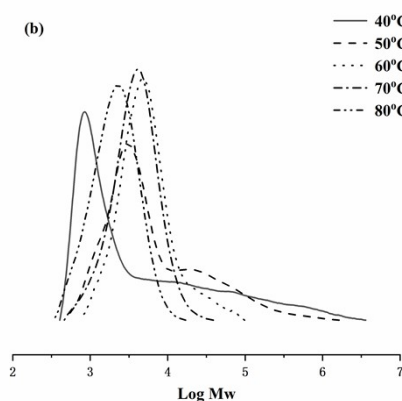

**Fig. S5** For **Fe1/MMAO**: GPC traces of the polymer as a function of temperature (entries 1 - 5, Table 3).

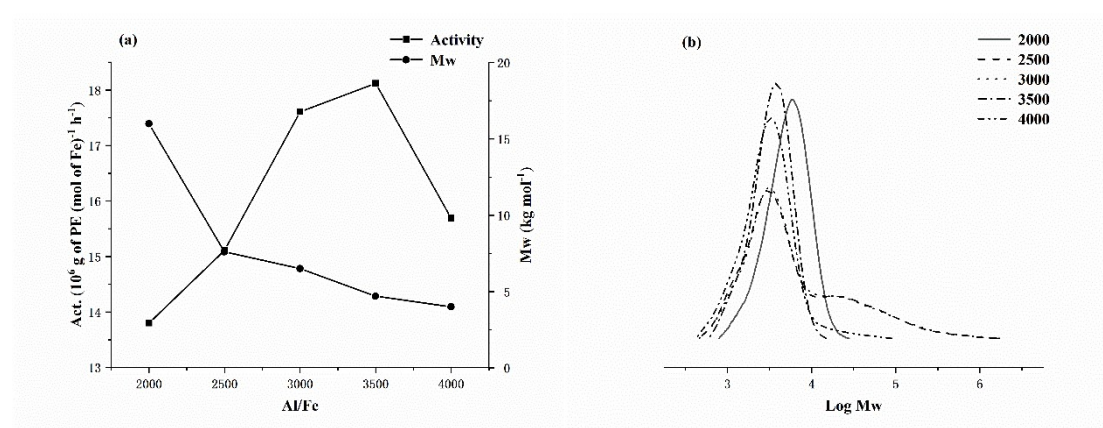

**Fig. S6** For **Fe1/MMAO**: (a) plots of catalytic activity and molecular weight of the polymer versus Al:Co molar ratio and (b) GPC traces of the polymer molecular weight as a function of the molar ratio (entries 2 and 6 - 9, Table 3).

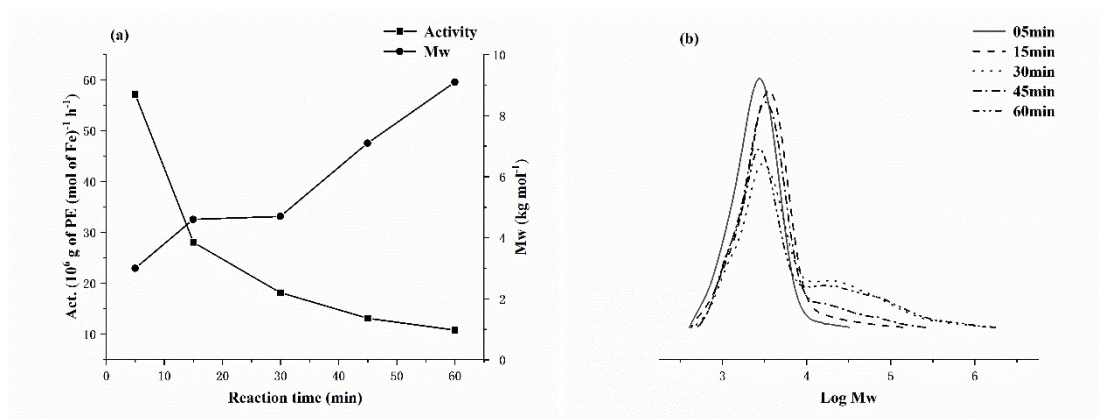

**Fig. S7** For **Fe1/MMAO**: (a) plots of catalytic activity and molecular weight of the polymer versus reaction time and (b) GPC traces of the polymer molecular weight as a function of reaction time (entries 8 and 10 - 13, Table 3).

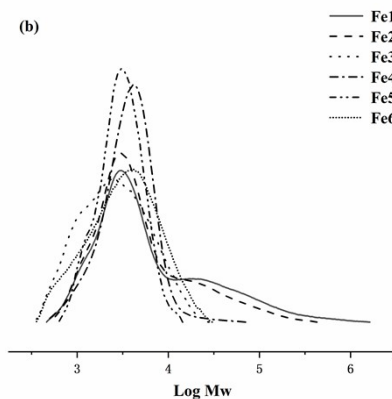

**Fig. S8** For **Fe1 – Fe6** with MAO as co-catalyst: GPC traces of the polymer as a function of the iron precatalyst (entries 8 and 16 - 20, Table 3).

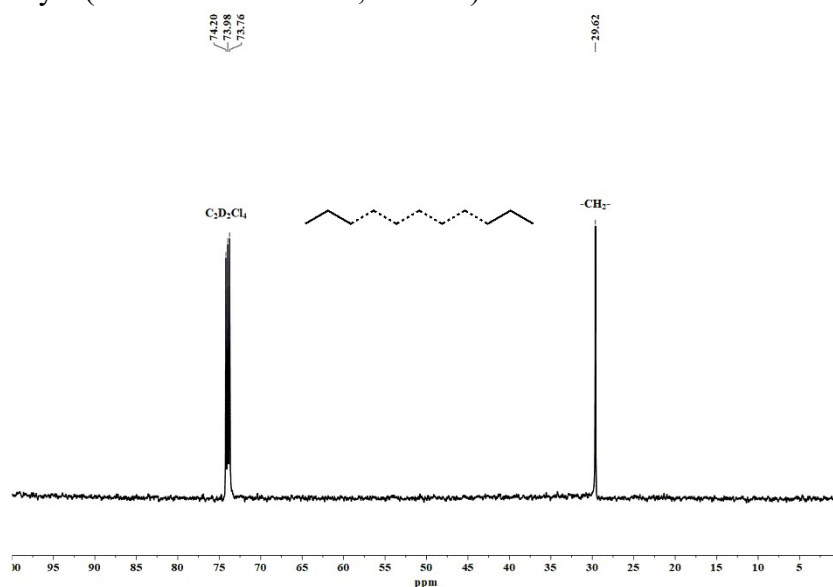

**Fig. S9**  $^{13}\text{C}$  NMR spectrum of the polyethylene obtained using **Fe1/MMAO** at  $50\text{ }^\circ\text{C}$  (entry 8, Table 3); recorded in 1,1,2,2- tetrachloroethane- $d_2$  at  $100\text{ }^\circ\text{C}$ .

# ESI(P),Fe1,20220721

**Analysis Info** Acquisition Date 7/21/2022 9:22:50 AM  
 Analysis Name D:\Data\ESI\2022\2022-07\07221\Fe1\_000003.d  
 Sample Name Fe1 Instrument solariX

**Acquisition Parameter**  
 Acquisition Mode Single MS Acquired Scans 10  
 Polarity Positive  
 Broadband Low Mass 57.7 m/z Broadband High Mass 1200.0 m/z

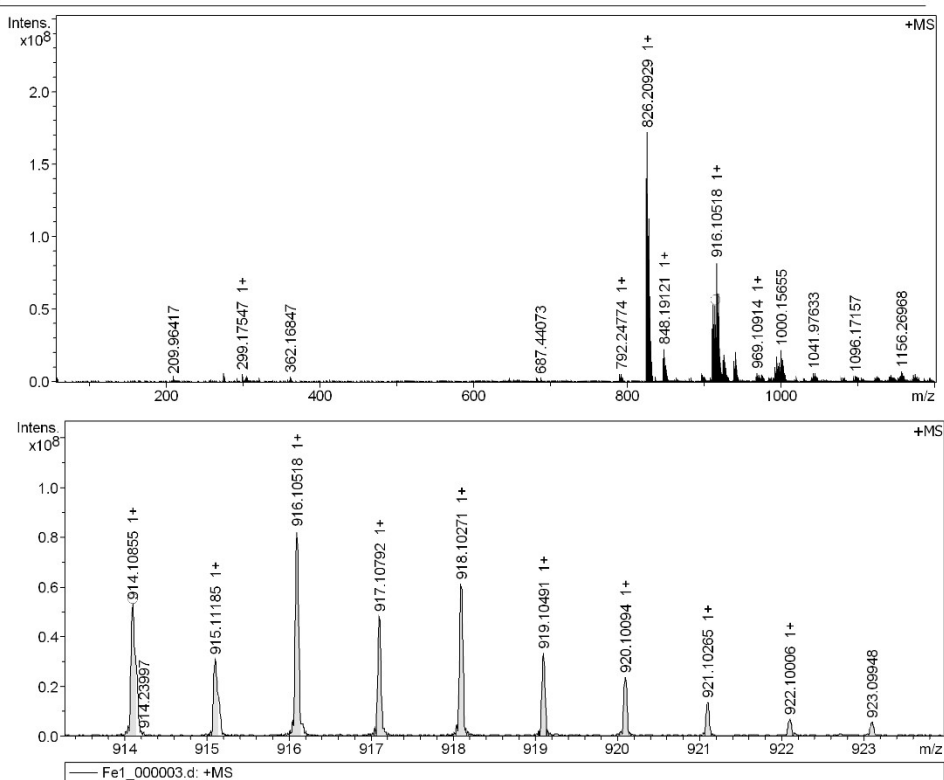

| Meas. m/z  | # | Ion Formula   | Score  | m/z        | err [ppm] | Mean err [ppm] | mSigma | rdb  | e <sup>-</sup> Conf | N-Rule |    |
|------------|---|---------------|--------|------------|-----------|----------------|--------|------|---------------------|--------|----|
| 914.108550 | 1 | C50H41Cl5FeN3 | 100.00 | 914.108956 | 0.4       |                | 1.7    | 30.5 | 29.5                | even   | ok |

**Fig. S10** High resolution (ESI-MS) mass spectrum for [2-{{2,6-((p-ClPh)<sub>2</sub>CH)<sub>2</sub>-4-MeC<sub>6</sub>H<sub>2</sub>}N=CMe}-6-{{(2,6-Me<sub>2</sub>C<sub>6</sub>H<sub>3</sub>)N=CMe}C<sub>5</sub>H<sub>3</sub>N]FeCl<sub>2</sub> (**Fe1**).

# ESI(P),Fe2,20220721

**Analysis Info** Acquisition Date 7/21/2022 9:28:37 AM  
 Analysis Name D:\Data\ESI\2022\2022-07\07221\Fe2\_000001.d  
 Sample Name Fe2 Instrument solariX

**Acquisition Parameter**  
 Acquisition Mode Single MS Acquired Scans 10  
 Polarity Positive Broadband High Mass 1200.0 m/z  
 Broadband Low Mass 57.7 m/z

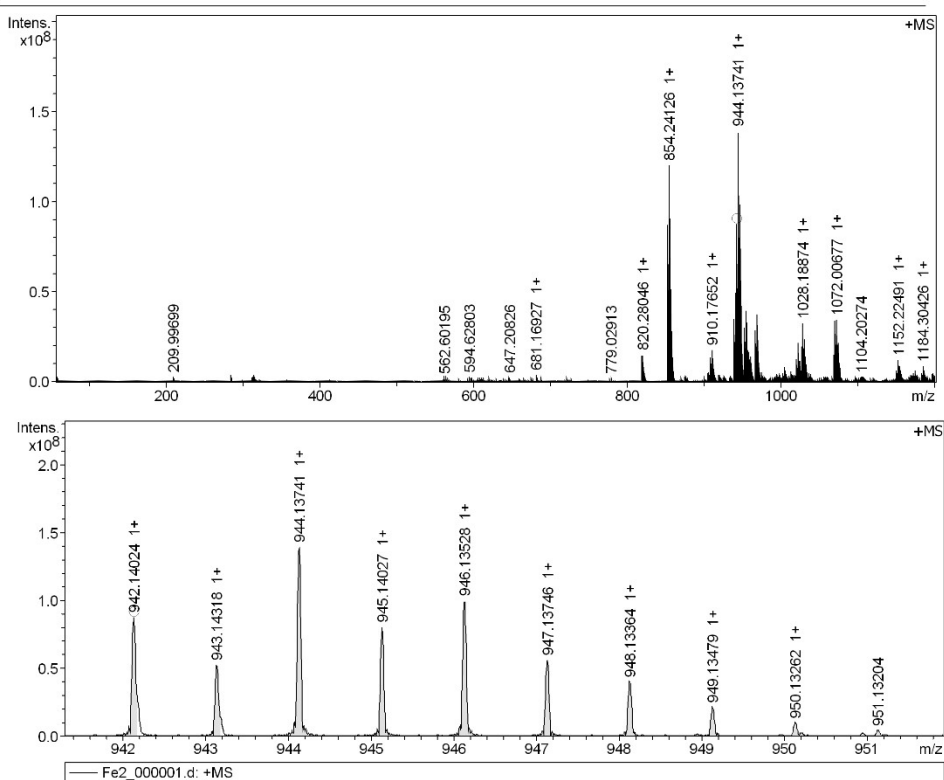

| Meas. m/z  | # | Ion Formula   | Score  | m/z        | err [ppm] | Mean err [ppm] | mSigma | rdb  | e <sup>-</sup> Conf | N-Rule |
|------------|---|---------------|--------|------------|-----------|----------------|--------|------|---------------------|--------|
| 942.140242 | 1 | C52H45Cl5FeN3 | 100.00 | 942.140264 | 0.0       | 0.7            | 18.7   | 29.5 | even                | ok     |

**Fig. S11** High resolution (ESI-MS) mass spectrum for [2-{{2,6-((p-ClPh)<sub>2</sub>CH)<sub>2</sub>-4-MeC<sub>6</sub>H<sub>2</sub>}N=CMe}-6-{{(2,6-Et<sub>2</sub>C<sub>6</sub>H<sub>3</sub>)N=CMe};C<sub>3</sub>H<sub>3</sub>N]FeCl<sub>2</sub> (**Fe2**).

# ESI(P),Fe3,20220721

**Analysis Info** Acquisition Date 7/21/2022 9:38:09 AM  
 Analysis Name D:\Data\ESI\2022\2022-07\07221\Fe3\_000002.d  
 Sample Name Fe3 Instrument solariX

**Acquisition Parameter**  
 Acquisition Mode Single MS Acquired Scans 10  
 Polarity Positive Broadband High Mass 1200.0 m/z  
 Broadband Low Mass 57.7 m/z

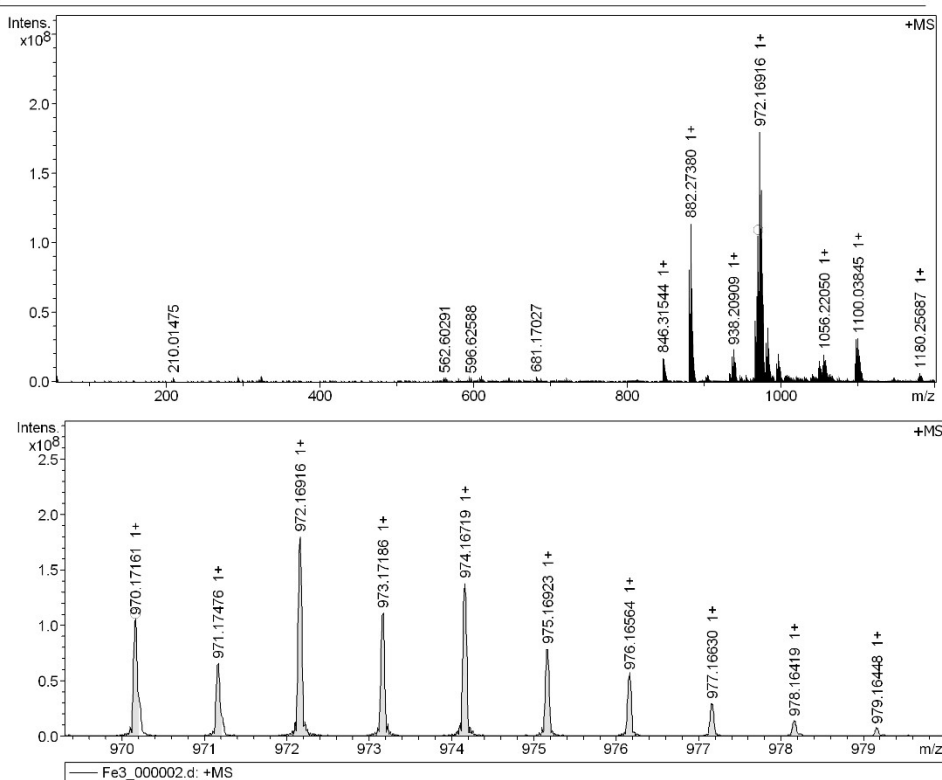

| Meas. m/z  | # | Ion Formula   | Score  | m/z        | err [ppm] | Mean err [ppm] | mSigma | rdb  | e <sup>-</sup> Conf | N-Rule |
|------------|---|---------------|--------|------------|-----------|----------------|--------|------|---------------------|--------|
| 970.171610 | 1 | C54H49Cl5FeN3 | 100.00 | 970.171572 | -0.0      | 0.6            | 25.1   | 29.5 | even                | ok     |

**Fig. S12** High resolution (ESI-MS) mass spectrum for [2-{{2,6-((p-ClPh)<sub>2</sub>CH)<sub>2</sub>-4-MeC<sub>6</sub>H<sub>2</sub>}N=CMe}-6-{{(2,6-*i*-Pr<sub>2</sub>C<sub>6</sub>H<sub>3</sub>)N=CMe}C<sub>5</sub>H<sub>3</sub>N]FeCl<sub>2</sub> (**Fe3**).



# ESI(P),Fe4,20220721

**Analysis Info** Acquisition Date 7/21/2022 9:43:38 AM  
 Analysis Name D:\Data\ESI\2022\2022-07\07221\Fe4\_000001.d  
 Sample Name Fe4 Instrument solariX

**Acquisition Parameter**  
 Acquisition Mode Single MS Acquired Scans 10  
 Polarity Positive  
 Broadband Low Mass 57.7 m/z Broadband High Mass 1200.0 m/z

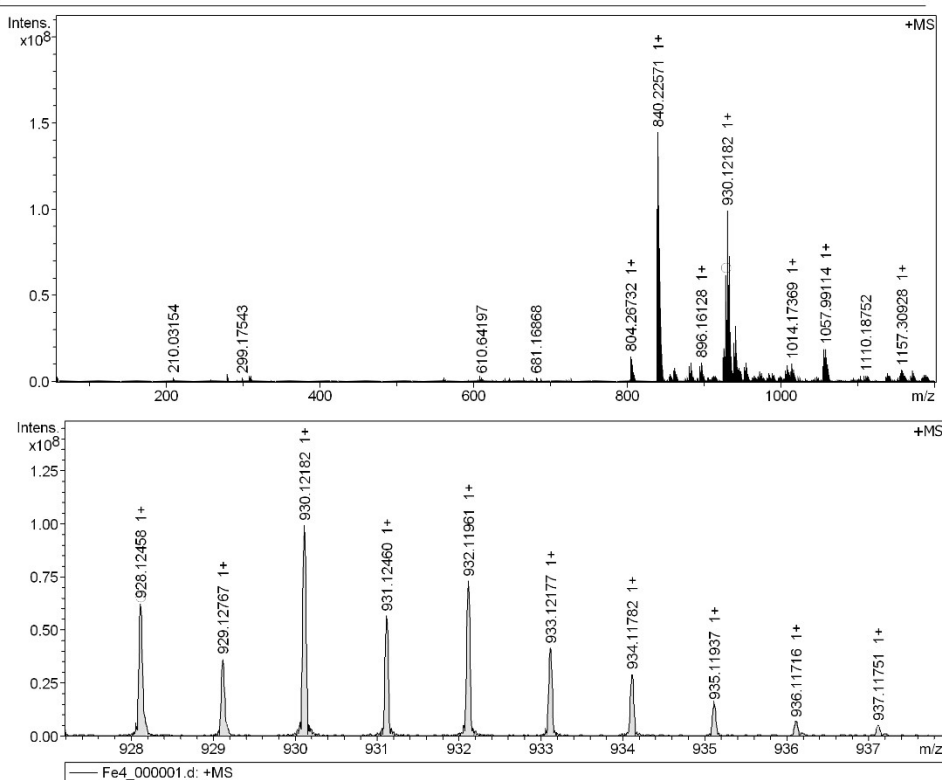

| Meas. m/z  | # | Ion Formula   | Score  | m/z        | err [ppm] | Mean err [ppm] | mSigma | rdb  | e <sup>-</sup> Conf | N-Rule |
|------------|---|---------------|--------|------------|-----------|----------------|--------|------|---------------------|--------|
| 928.124576 | 1 | C51H43Cl5FeN3 | 100.00 | 928.124610 | -0.0      | 0.5            | 25.8   | 29.5 | even                | ok     |

**Fig. S13** High resolution (ESI-MS) mass spectrum for [2-{{2,6-((p-ClPh)<sub>2</sub>CH)<sub>2</sub>-4-MeC<sub>6</sub>H<sub>2</sub>}N=CMe}-6-{{(2,4,6-Me<sub>3</sub>C<sub>6</sub>H<sub>2</sub>}N=CMe}C<sub>5</sub>H<sub>3</sub>N]FeCl<sub>2</sub> (**Fe4**).

# ESI(P),Fe5,20220721

**Analysis Info** Acquisition Date 7/21/2022 9:48:09 AM  
 Analysis Name D:\Data\ESI\2022\2022-07\07221\Fe5\_000001.d  
 Sample Name Fe5 Instrument solariX

**Acquisition Parameter**  
 Acquisition Mode Single MS Acquired Scans 10  
 Polarity Positive Broadband High Mass 1200.0 m/z  
 Broadband Low Mass 57.7 m/z

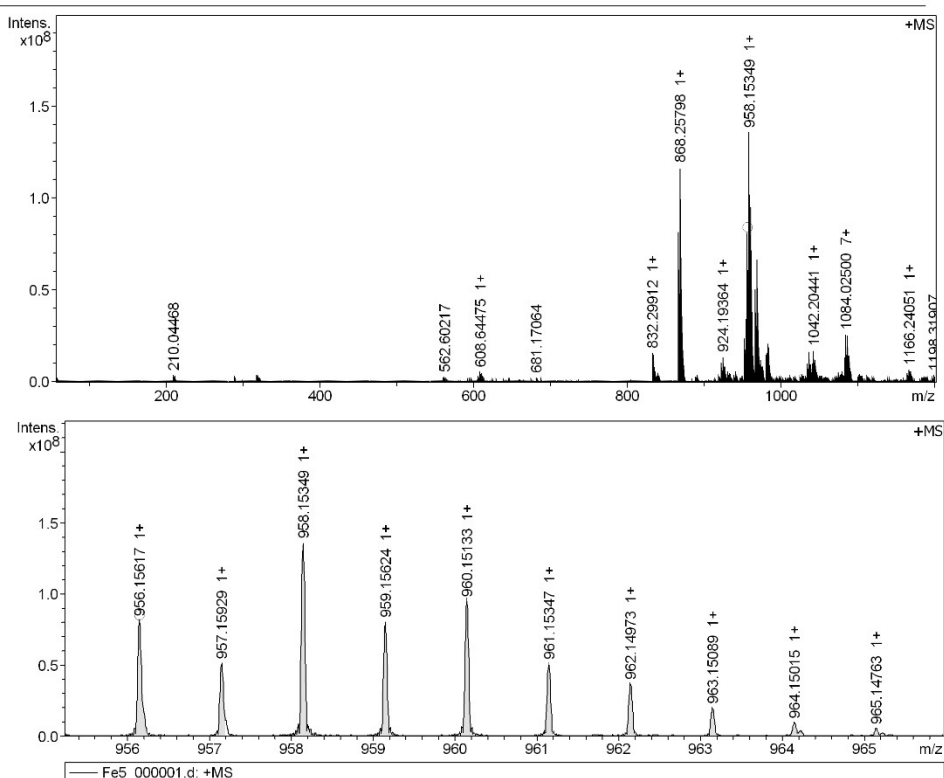

| Meas. m/z  | # | Ion Formula   | Score  | m/z        | err [ppm] | Mean err [ppm] | mSigma | rdb  | e <sup>-</sup> Conf | N-Rule |
|------------|---|---------------|--------|------------|-----------|----------------|--------|------|---------------------|--------|
| 956.156174 | 1 | C53H47C15FeN3 | 100.00 | 956.155918 | 0.3       | 0.2            | 17.8   | 29.5 | even                | ok     |

**Fig. S14** High resolution (ESI-MS) mass spectrum for [2-{{2,6-((p-ClPh)<sub>2</sub>CH)<sub>2</sub>-4-MeC<sub>6</sub>H<sub>2</sub>}N=CMe}-6-{{(2,6-Et<sub>2</sub>-4-MeC<sub>6</sub>H<sub>2</sub>)N=CMe}C<sub>3</sub>H<sub>3</sub>N]FeCl<sub>2</sub> (**Fe5**).
